# Supplementary material for: The Cerebrospinal Fluid Free-Glycans Hex1 and HexNAc1Hex1Neu5Ac1 as Potential Biomarkers of Alzheimer’s Disease
Source: MDPI journal article supplement (doi:10.3390/biom14050512), 2024-04-24
Supplement: s1 [file s1]

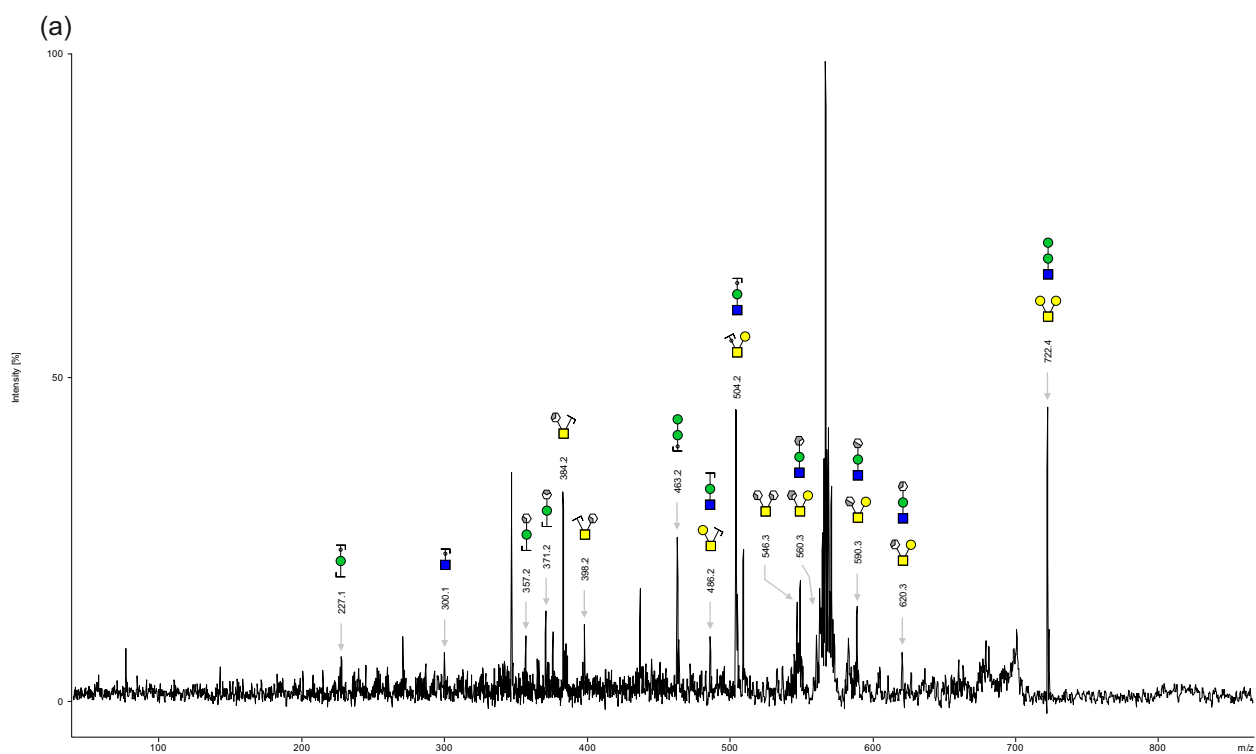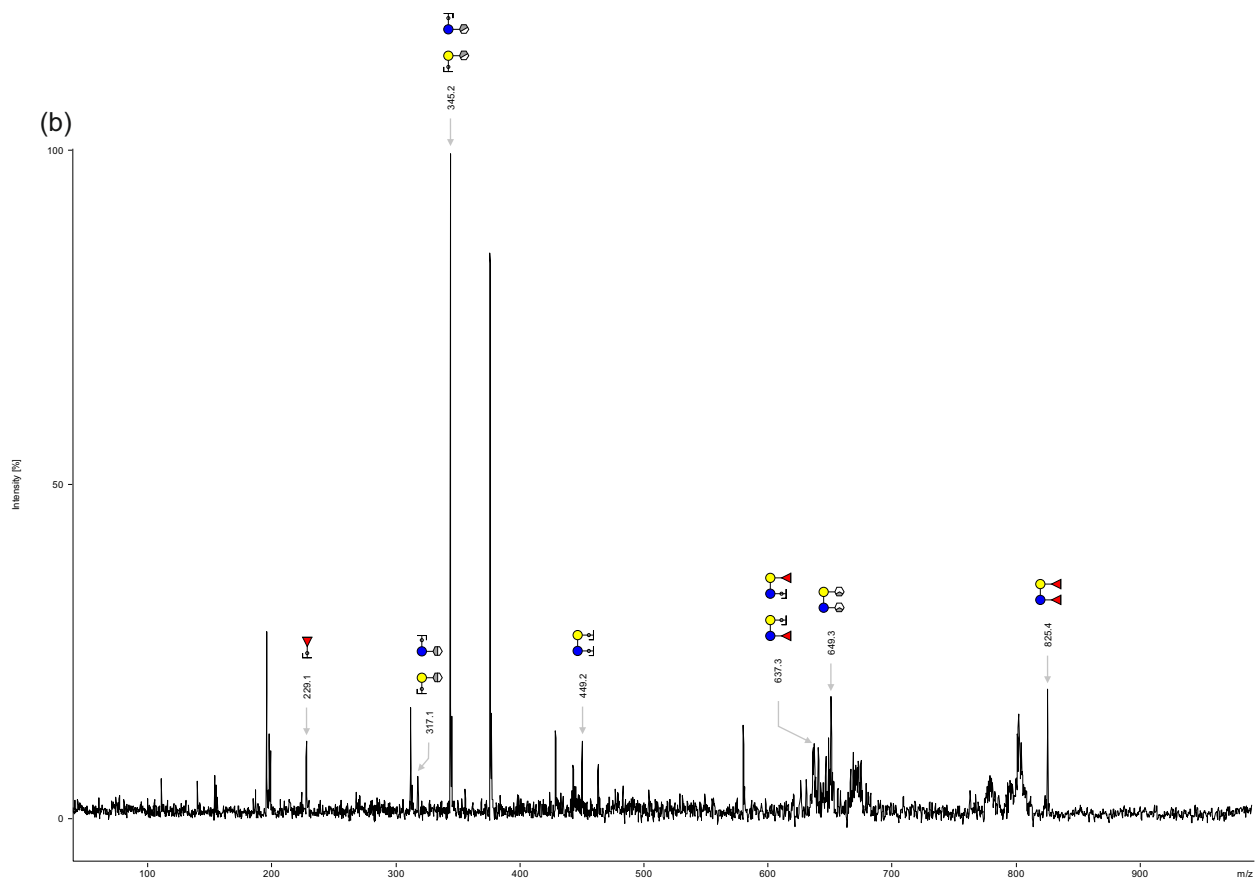

(c)

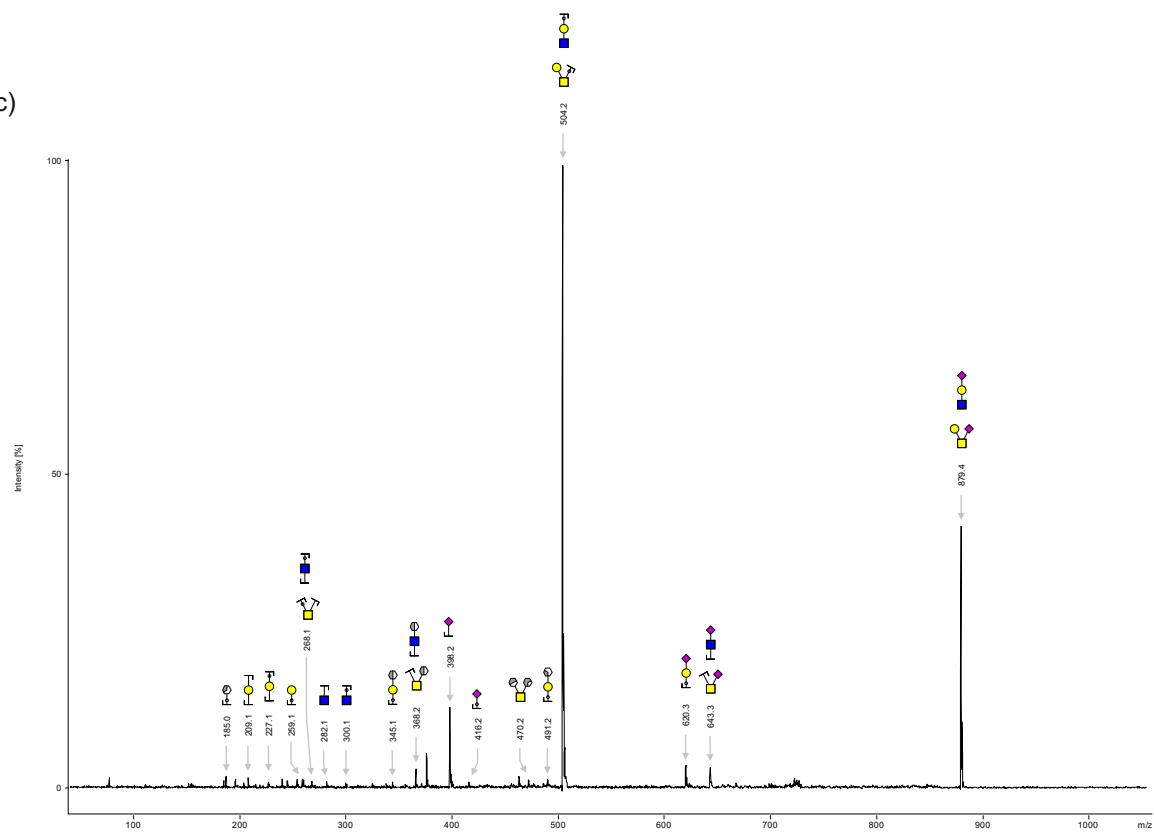

(d)

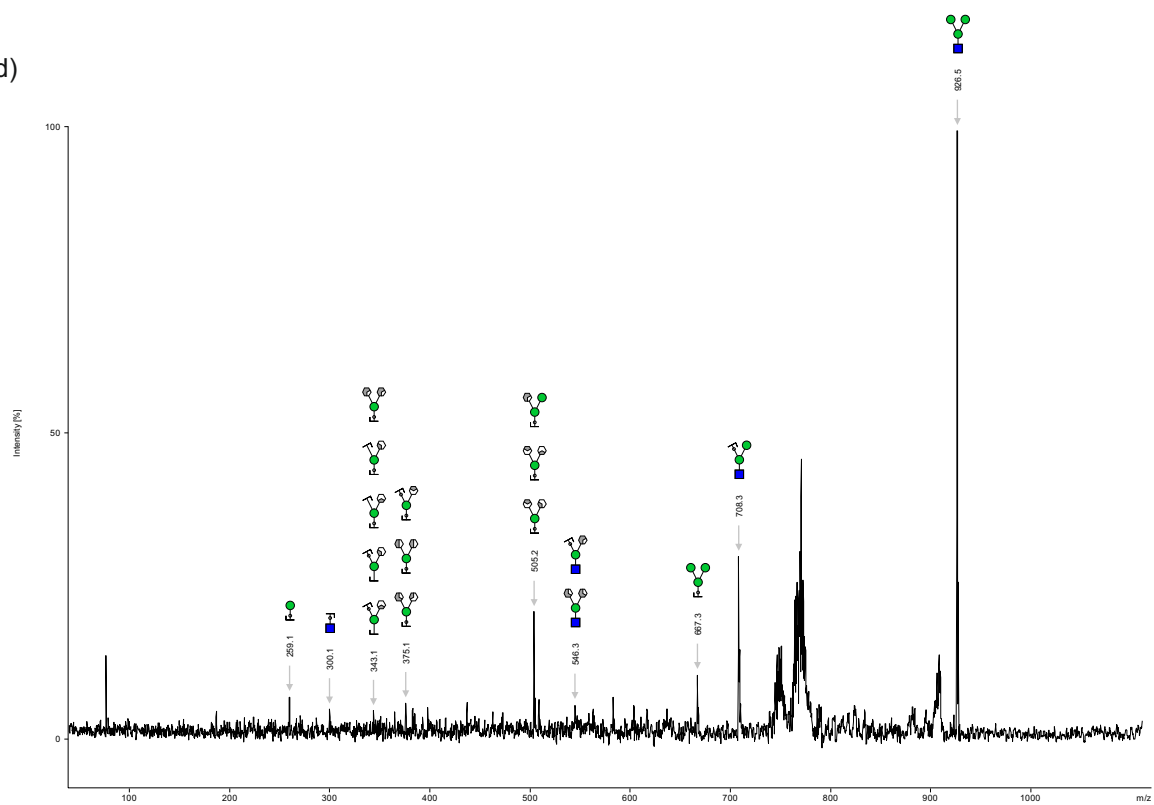

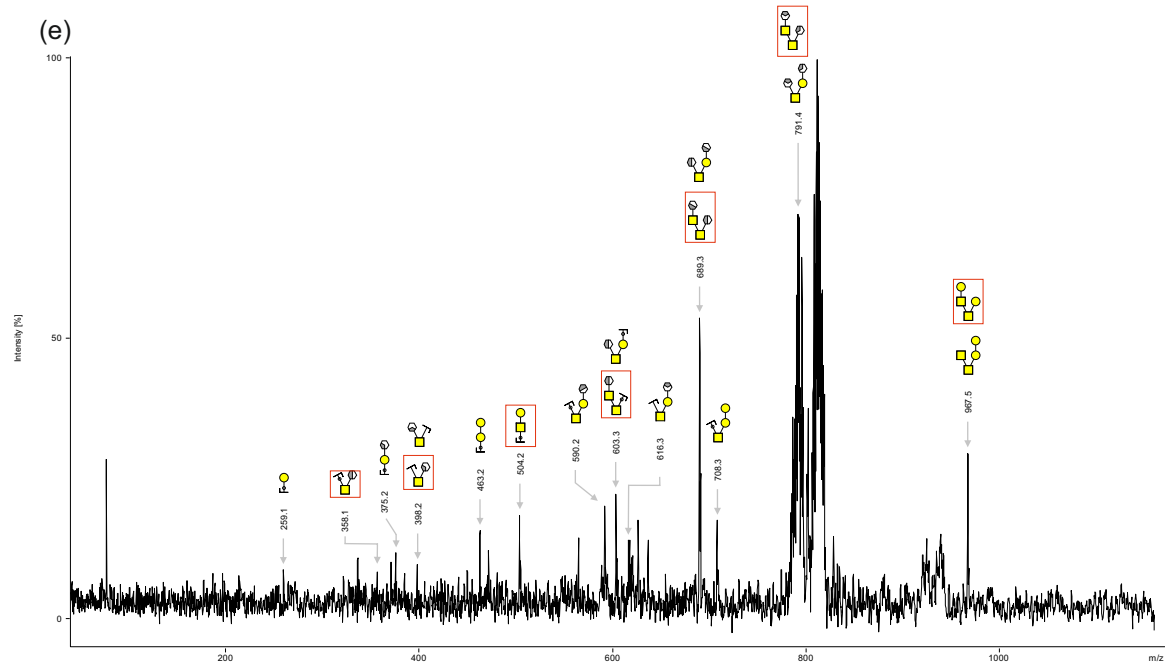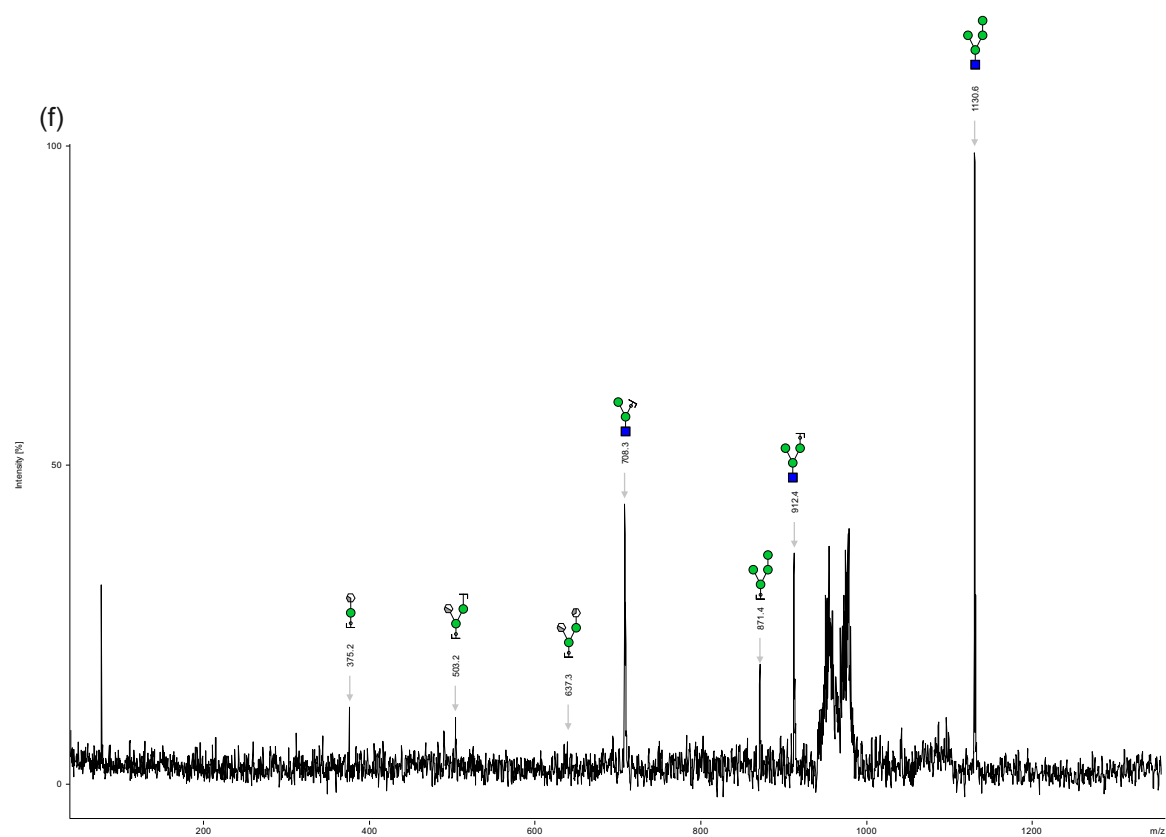

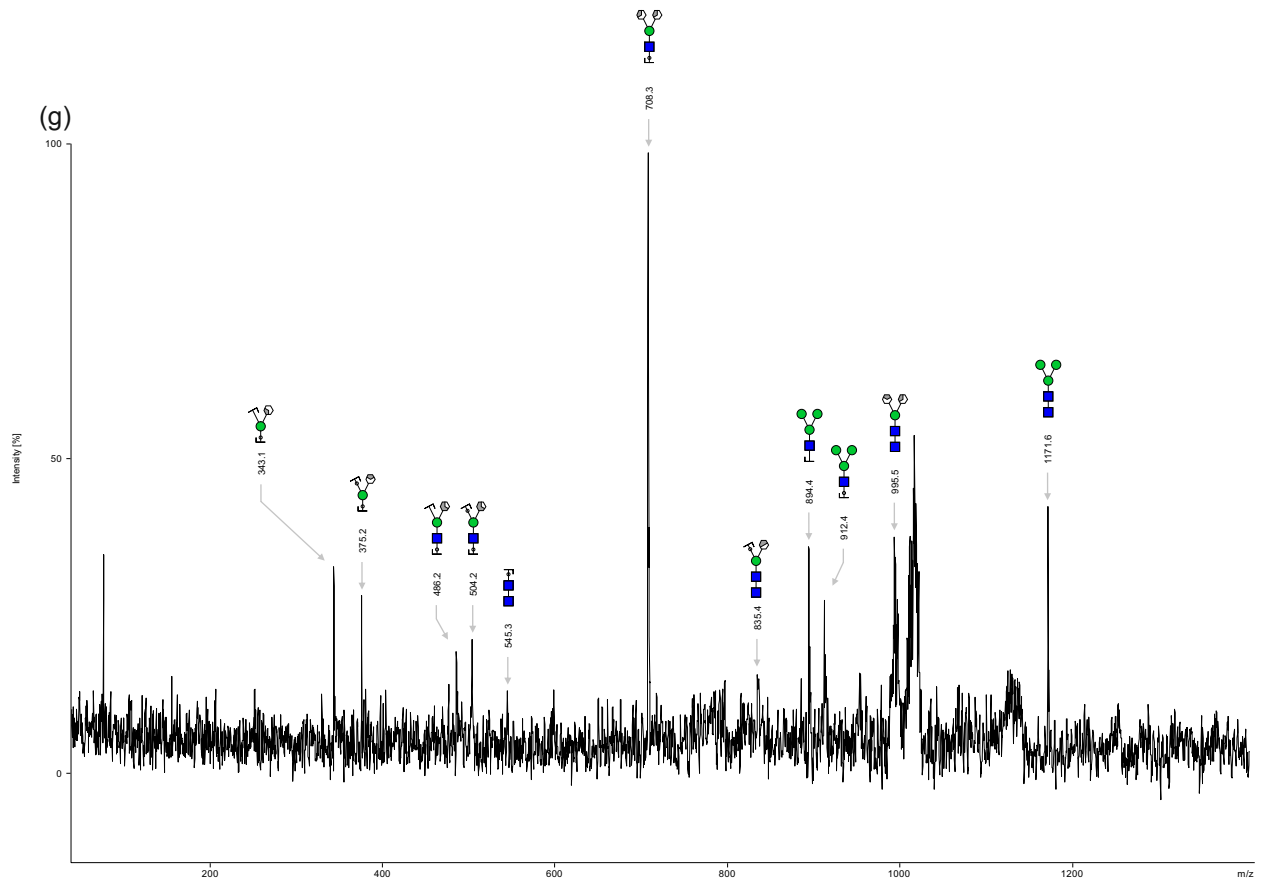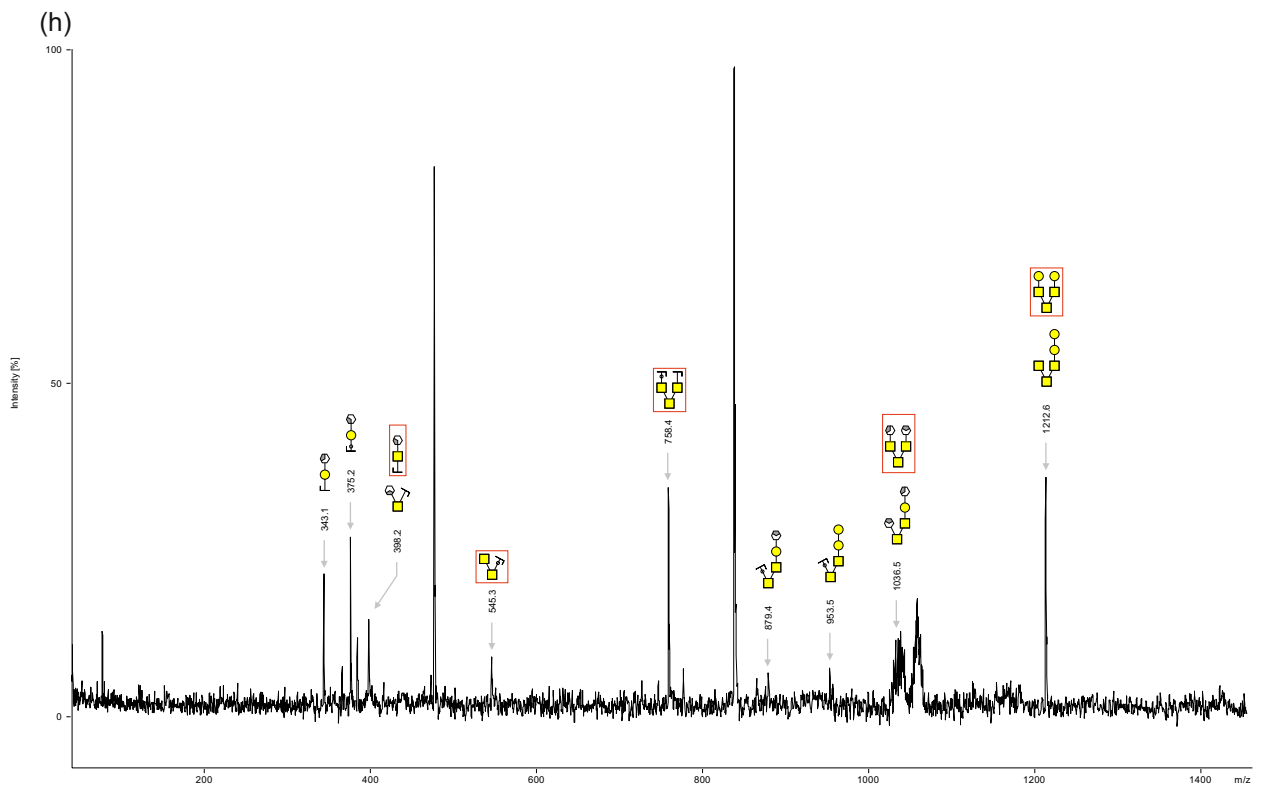

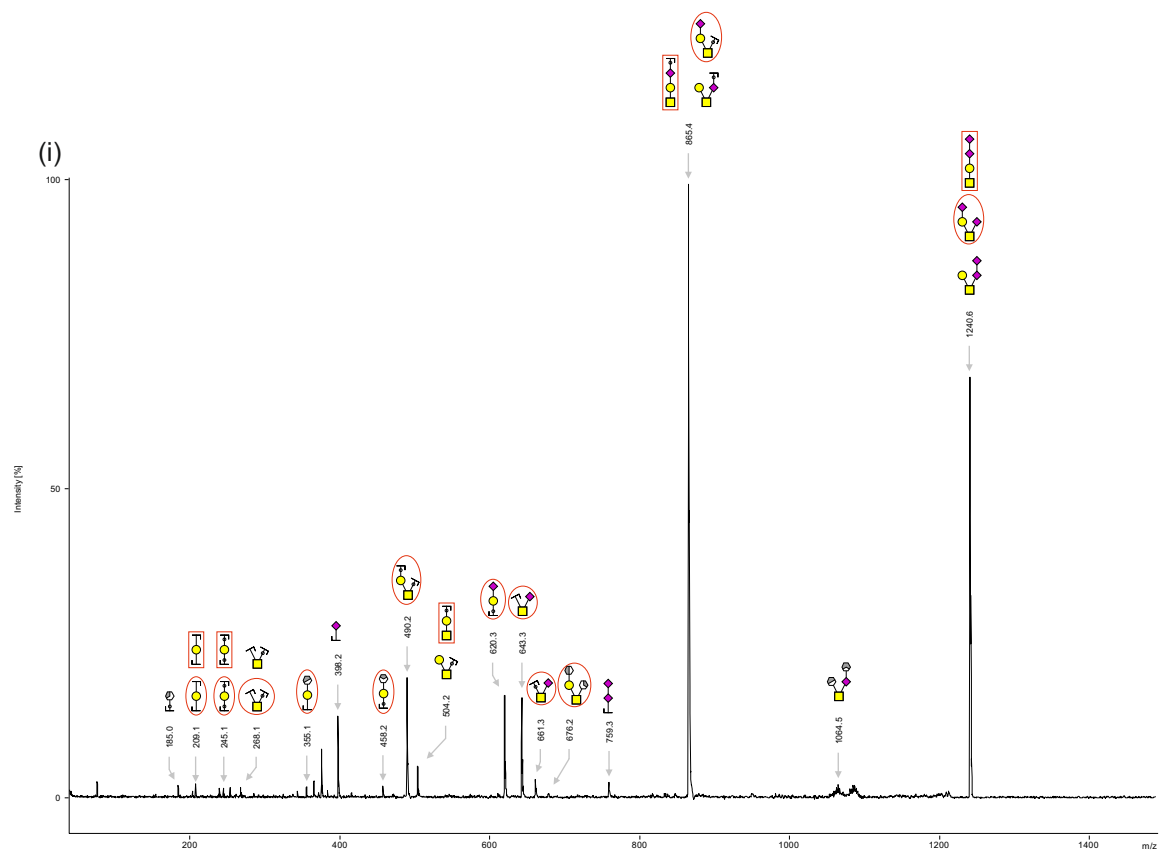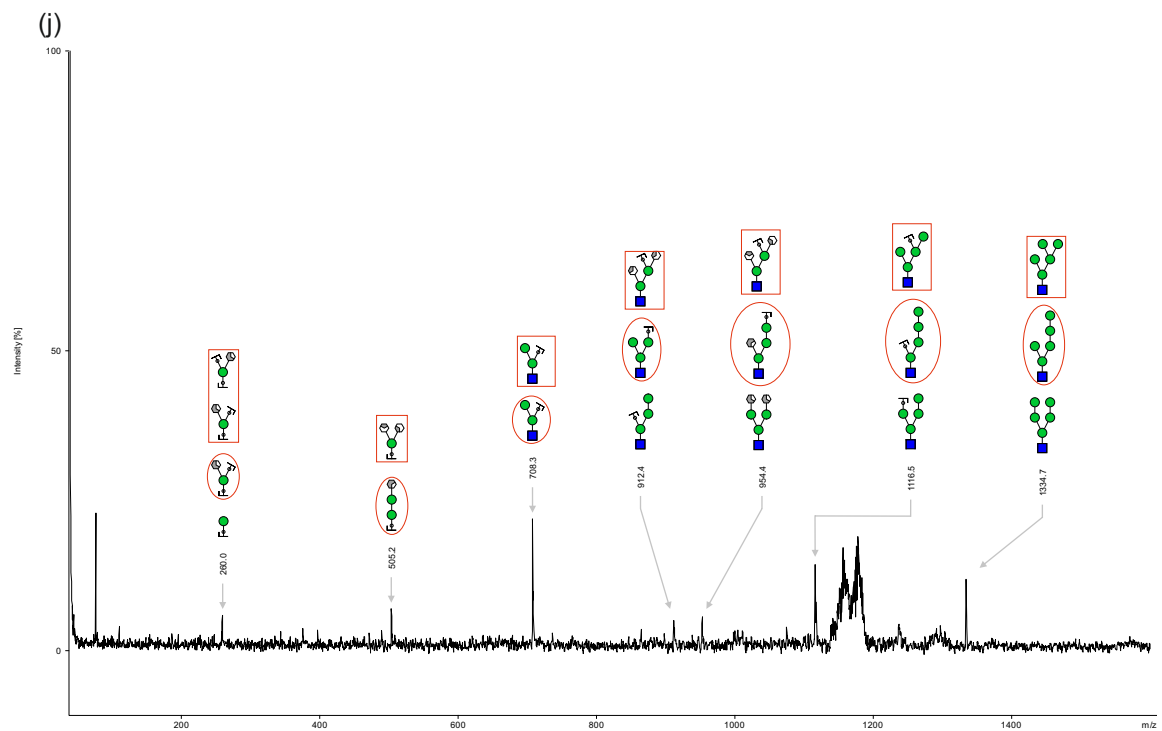

Figure S1. MALDI-TOF/TOF mass spectra of the  $[M + Na]^+$  molecular ions at  $m/z$  (a) 722.4, (b) 825.4, (c) 879.4, (d) 926.5, (e) 967.5, (f) 1130.6, (g) 1171.6, (h) 1212.6, (i) 1240.6, (j) 1334.7 derived from free glycans isolated from CSF. Registered fragments may be formed by different fragmentation pathways, only one of which is depicted in the figure. Green circle, Man; yellow circle, Gal; yellow square, GalNAc; blue square, GlcNAc; red triangle, Fuc; Neu5Ac: pink diamond.

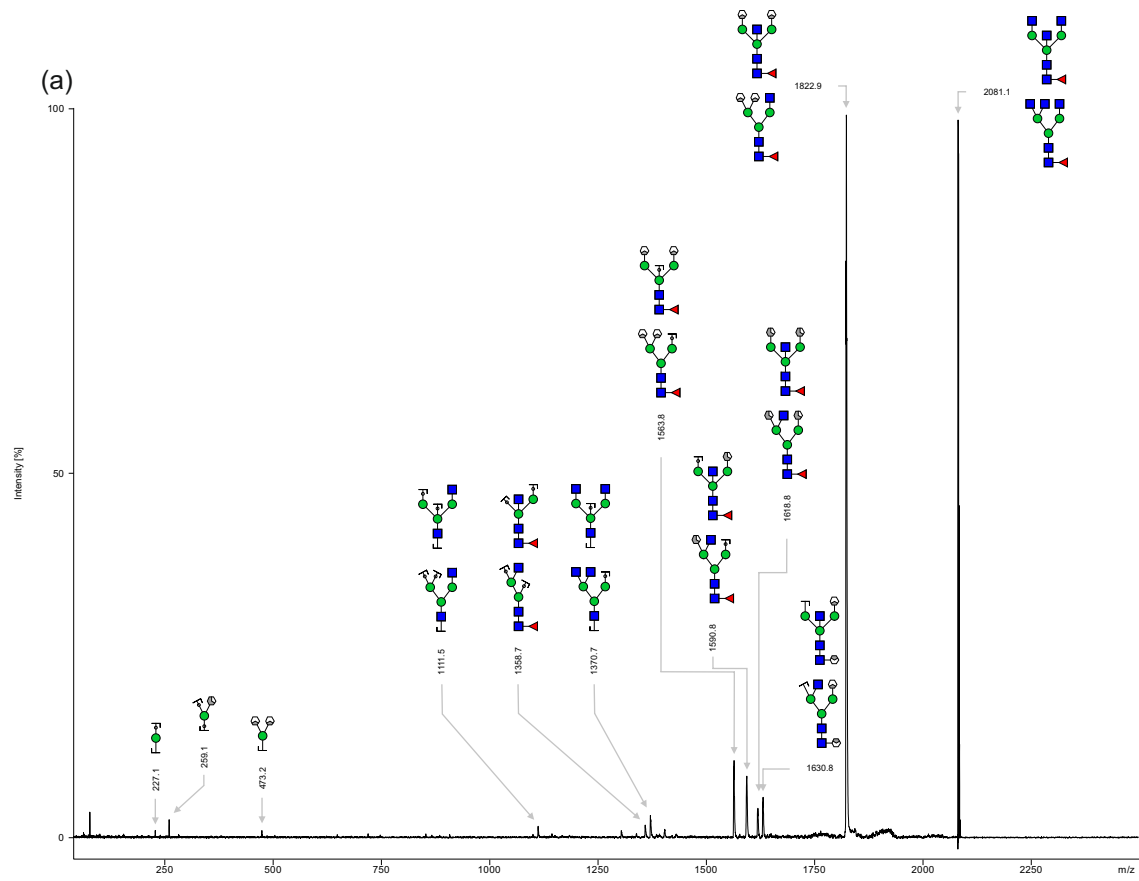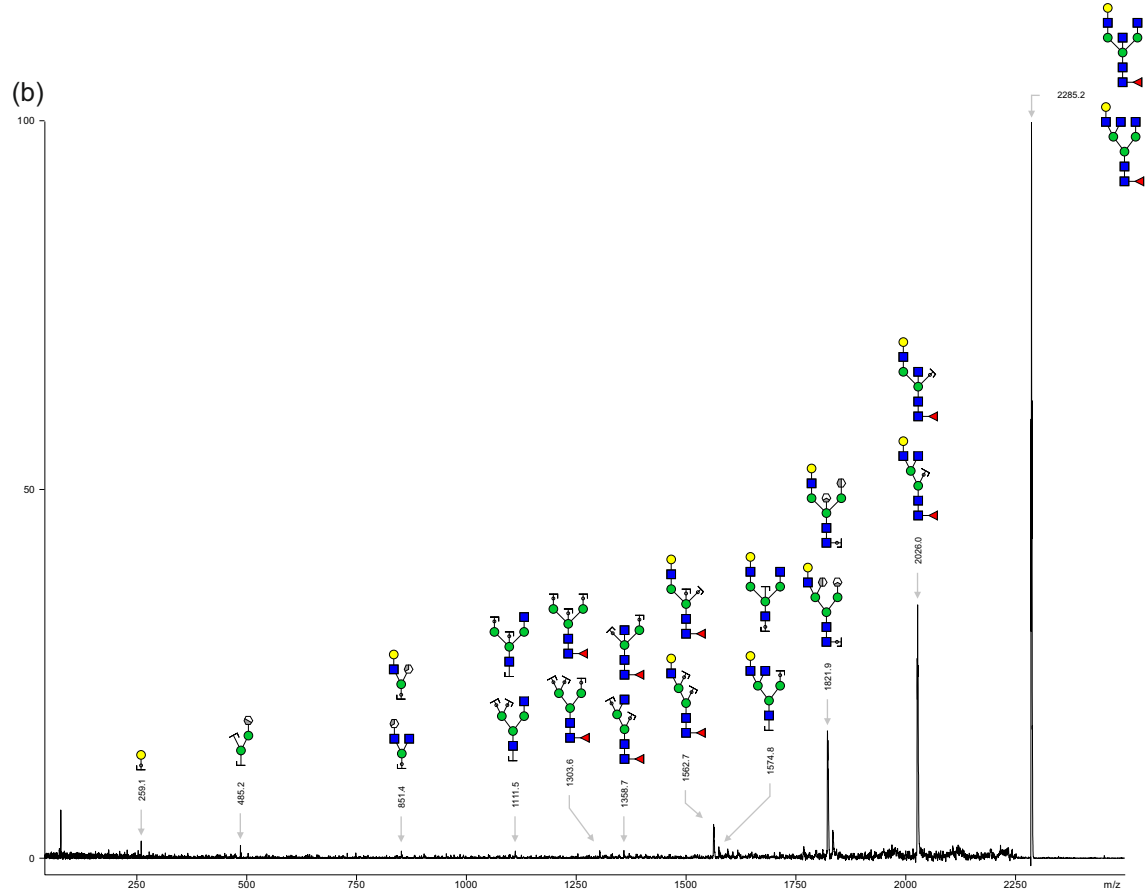

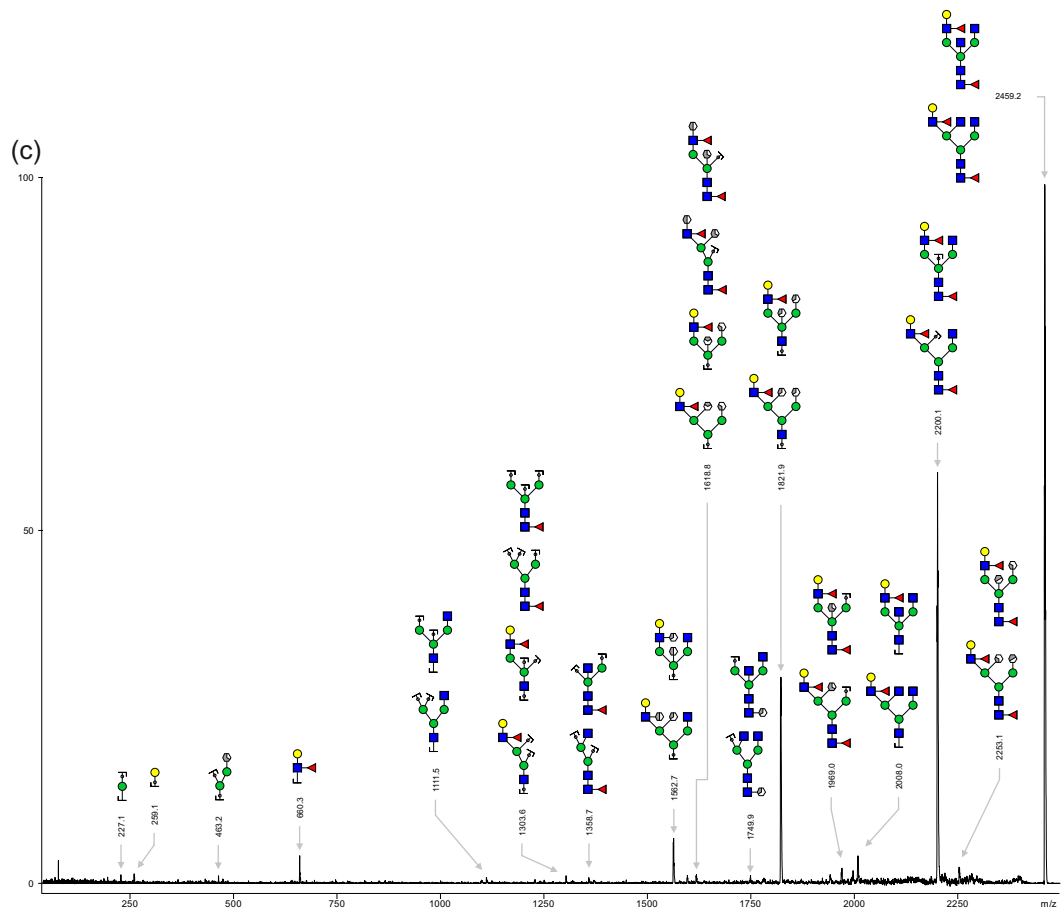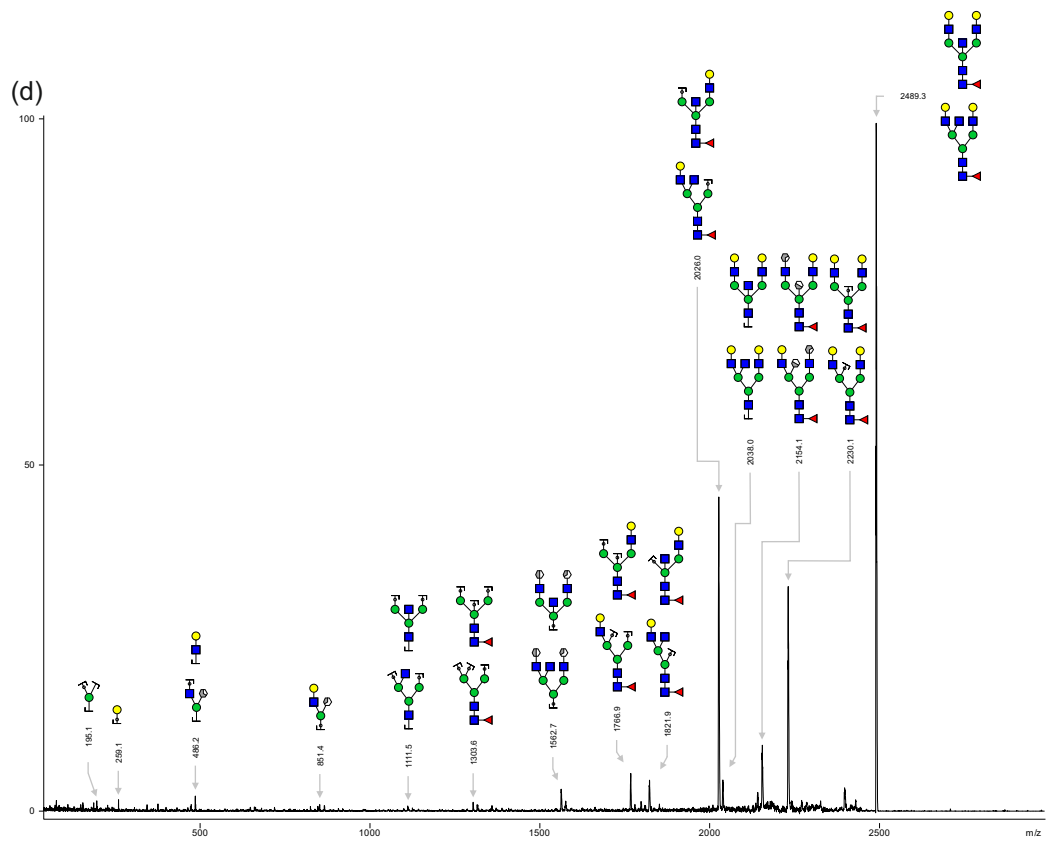

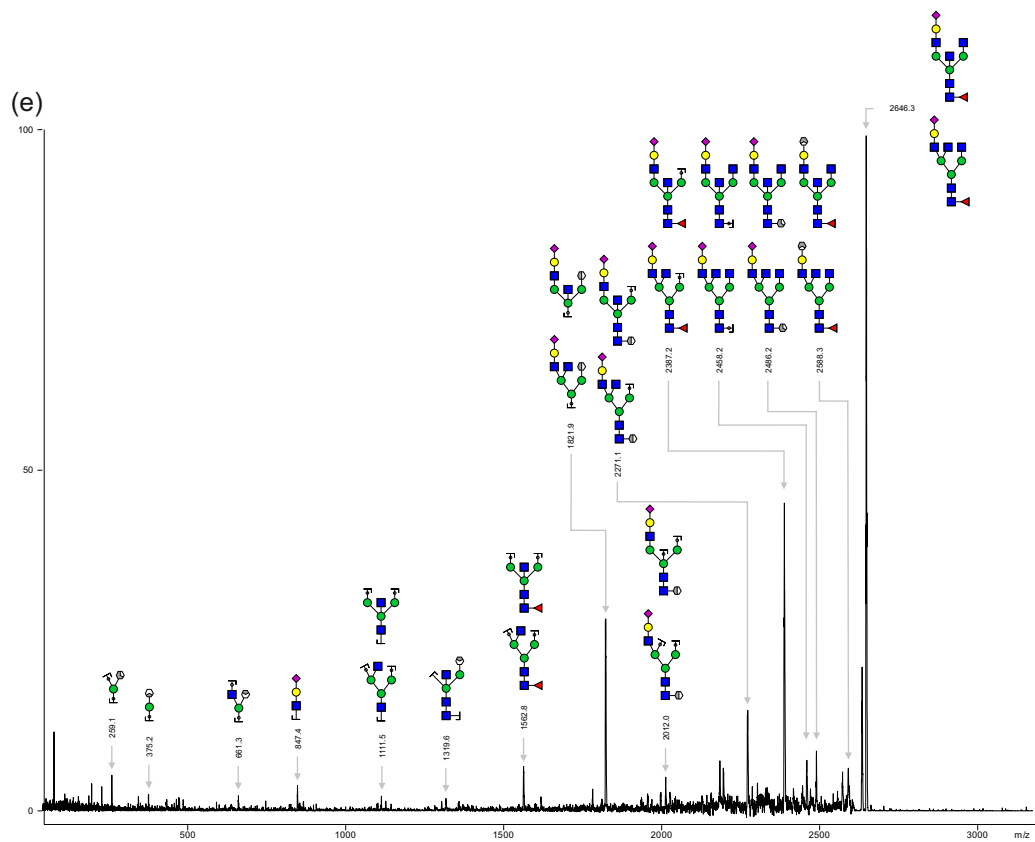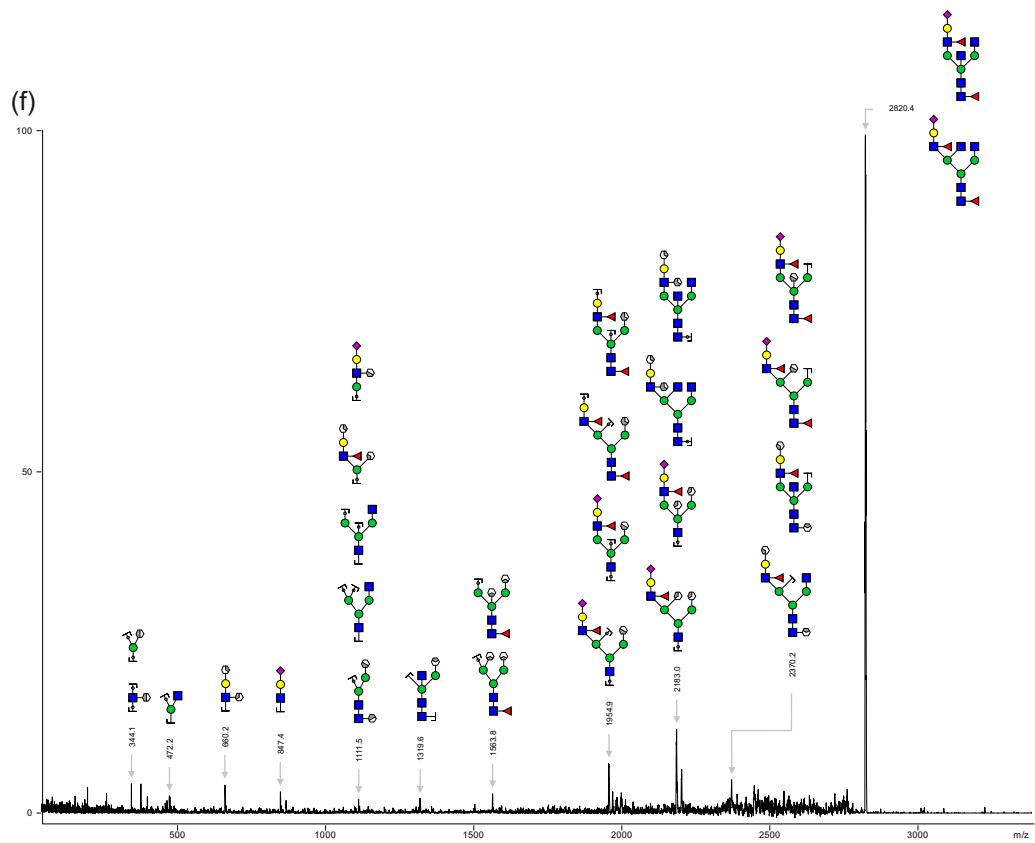



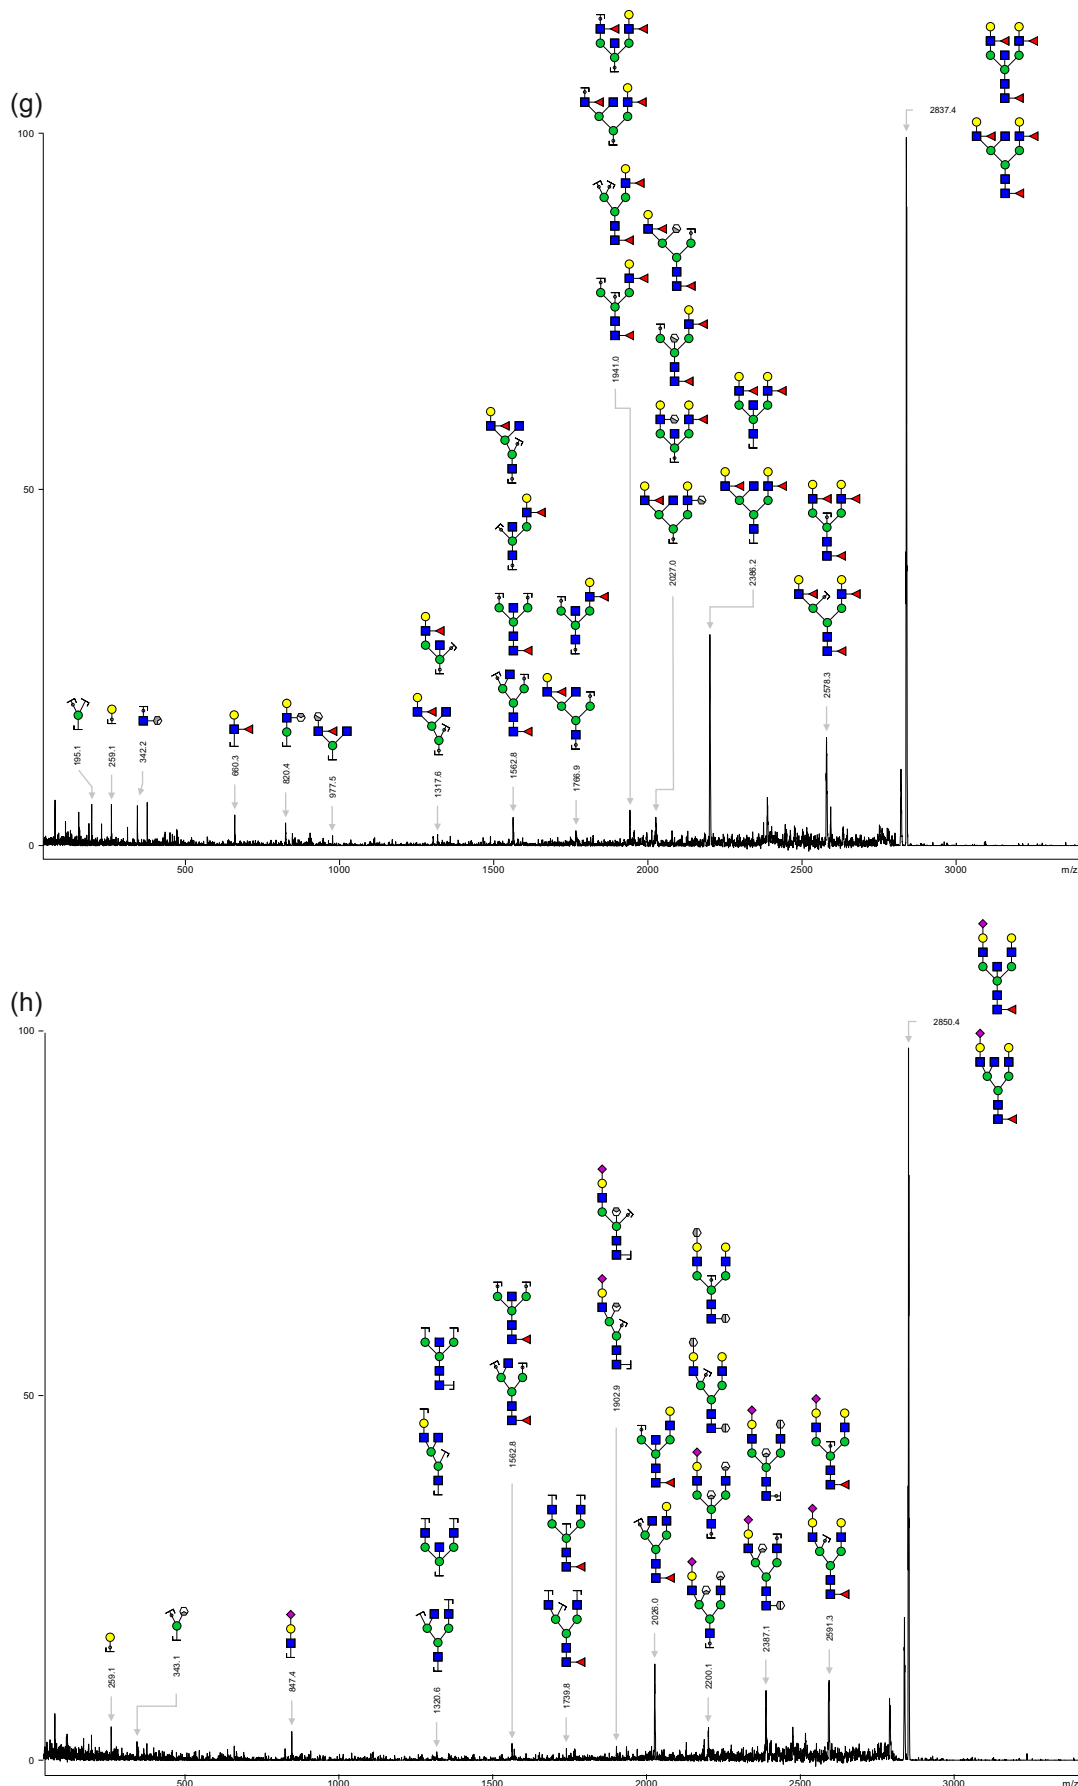

Figure S2. MALDI-TOF/TOF mass spectra of the  $[M + Na]^+$  molecular ions at  $m/z$  (a) 2081.1, (b) 2285.2 (c) 2459.2 (d) 2489.3 (e) 2646.3, (f) 2820.4 (g) 2837.4, (h) 2850.4, derived from N-glycans isolated from CSF. Registered fragments may be formed by different fragmentation pathway which is depicted in the figure. Green circle, Man; yellow circle, Gal; blue square, GlcNAc; red triangle, Fuc; Neu5Ac: pink diamond.

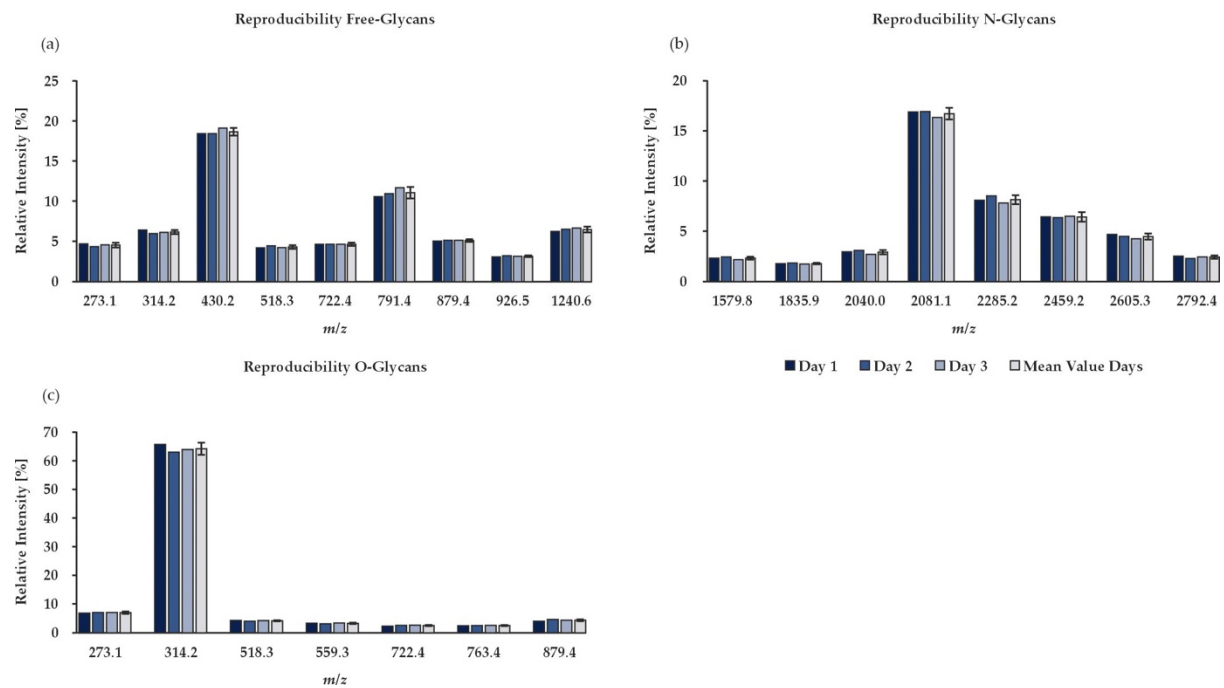

Figure S3: Inter-day reproducibility of the analytical workflow used to prepare (a) free glycans, (b) N-glycans and (c) O-glycans from CSF. Average is shown as mean  $\pm$  SD.

Supplementary Material: Tables

Table S1: Two-way analysis of variance (ANOVA) to assess any statistical significance of gender in the dataset of free-glycans. P-values  $\leq 0.05$  were considered as statistically significant and p-values  $\leq 0.01$  as highly significant.

| <i>m/z</i> | Composition                                              | Significance Levene-<br>Test | Significance -<br>Group | Significance –<br>Sex | Significance –<br>Group * Sex |
|------------|----------------------------------------------------------|------------------------------|-------------------------|-----------------------|-------------------------------|
| 273.1      | Hex <sub>1</sub>                                         | 0.002                        | 0.000                   | 0.799                 | 0.658                         |
| 314.2      | HexNAc <sub>1</sub>                                      | 0.098                        | 0.003                   | 0.217                 | 0.457                         |
| 430.2      | Neu5Ac <sub>1</sub>                                      | 0.034                        | 0.682                   | 0.462                 | 0.708                         |
| 518.3      | Hex <sub>1</sub> HexNAc <sub>1</sub>                     | 0.000                        | 0.000                   | 0.546                 | 0.262                         |
| 559.3      | HexNAc <sub>2</sub>                                      | 0.001                        | 0.000                   | 0.165                 | 0.276                         |
| 675.3      | Neu5Ac <sub>1</sub> HexNAc <sub>1</sub>                  | 0.003                        | 0.000                   | 0.083                 | 0.214                         |
| 722.4      | Hex <sub>2</sub> HexNAc <sub>1</sub>                     | 0.004                        | 0.000                   | 0.500                 | 0.770                         |
| 733.4      | Fuc <sub>1</sub> HexNAc <sub>2</sub>                     | 0.009                        | 0.000                   | 0.482                 | 0.289                         |
| 791.4      | Neu5Ac <sub>2</sub>                                      | 0.001                        | 0.025                   | 0.584                 | 0.584                         |
| 825.4      | Fuc <sub>2</sub> Hex <sub>2</sub>                        | 0.031                        | 0.033                   | 0.901                 | 0.974                         |
| 879.4      | NeuAc <sub>1</sub> Hex <sub>1</sub> HexNAc <sub>1</sub>  | 0.209                        | 0.000                   | 0.733                 | 0.364                         |
| 926.5      | Hex <sub>3</sub> HexNAc <sub>1</sub>                     | 0.003                        | 0.000                   | 0.592                 | 0.802                         |
| 967.5      | Hex <sub>2</sub> HexNAc <sub>2</sub>                     | 0.000                        | 0.000                   | 0.215                 | 0.675                         |
| 1130.6     | Hex <sub>4</sub> HexNAc <sub>1</sub>                     | 0.000                        | 0.000                   | 0.919                 | 0.954                         |
| 1171.6     | Hex <sub>3</sub> HexNAc <sub>2</sub>                     | 0.000                        | 0.002                   | 0.200                 | 0.818                         |
| 1212.6     | Hex <sub>2</sub> HexNAc <sub>3</sub>                     | 0.006                        | 0.143                   | 0.238                 | 0.857                         |
| 1240.6     | Neu5Ac <sub>2</sub> Hex <sub>1</sub> HexNAc <sub>1</sub> | 0.927                        | 0.032                   | 0.789                 | 0.494                         |
| 1334.7     | Hex <sub>5</sub> HexNAc <sub>1</sub>                     | 0.002                        | 0.000                   | 0.974                 | 0.971                         |
| 1601.8     | Neu5Ac <sub>3</sub> Hex <sub>1</sub> HexNAc <sub>1</sub> | 0.930                        | 0.000                   | 0.451                 | 0.516                         |

Table S2: Two-way analysis of variance (ANOVA) to evaluate the statistical significance of gender in the dataset of N-glycans. P-values  $\leq 0.05$  were considered as statistically significant and p-values  $\leq 0.01$  as highly significant.

| <i>m/z</i> | Composition                                                               | Significance<br>Levene-Test | Significance<br>Patient<br>Groups | Significance<br>– Sex | Significance –<br>Group * Sex |
|------------|---------------------------------------------------------------------------|-----------------------------|-----------------------------------|-----------------------|-------------------------------|
| 1579.8     | Hex <sub>5</sub> HexNAc <sub>2</sub>                                      | 0.001                       | 0.002                             | 0.001                 | 0.282                         |
| 1661.8     | Hex <sub>3</sub> HexNAc <sub>4</sub>                                      | 0.007                       | 0.000                             | 0.357                 | 0.030                         |
| 1783.9     | Hex <sub>6</sub> HexNAc <sub>2</sub>                                      | 0.001                       | 0.025                             | 0.438                 | 0.566                         |
| 1835.9     | Fuc <sub>1</sub> Hex <sub>3</sub> HexNAc <sub>4</sub>                     | 0.000                       | 0.012                             | 0.422                 | 0.013                         |
| 2040.0     | Fuc <sub>1</sub> Hex <sub>4</sub> HexNAc <sub>4</sub>                     | 0.005                       | 0.188                             | 0.041                 | 0.129                         |
| 2070.0     | Hex <sub>5</sub> HexNAc <sub>4</sub>                                      | 0.002                       | 0.506                             | 0.780                 | 0.937                         |
| 2081.1     | Fuc <sub>1</sub> Hex <sub>3</sub> HexNAc <sub>5</sub>                     | 0.000                       | 0.006                             | 0.023                 | 0.109                         |
| 2111.1     | Hex <sub>4</sub> HexNAc <sub>5</sub>                                      | 0.118                       | 0.004                             | 0.770                 | 0.540                         |
| 2214.1     | Fuc <sub>2</sub> Hex <sub>4</sub> HexNAc <sub>4</sub>                     | 0.354                       | 0.006                             | 0.214                 | 0.010                         |
| 2244.1     | Fuc <sub>1</sub> Hex <sub>5</sub> HexNAc <sub>4</sub>                     | 0.008                       | 0.003                             | 0.006                 | 0.736                         |
| 2285.2     | Fuc <sub>1</sub> Hex <sub>4</sub> HexNAc <sub>5</sub>                     | 0.000                       | 0.137                             | 0.574                 | 0.359                         |
| 2431.2     | Neu5Ac <sub>1</sub> Hex <sub>5</sub> HexNAc <sub>4</sub>                  | 0.025                       | 0.254                             | 0.723                 | 0.312                         |
| 2459.2     | Fuc <sub>2</sub> Hex <sub>4</sub> HexNAc <sub>5</sub>                     | 0.016                       | 0.000                             | 0.000                 | 0.972                         |
| 2489.3     | Fuc <sub>1</sub> Hex <sub>5</sub> HexNAc <sub>5</sub>                     | 0.009                       | 0.009                             | 0.045                 | 0.766                         |
| 2592.3     | Fuc <sub>3</sub> Hex <sub>5</sub> HexNAc <sub>4</sub>                     | 0.051                       | 0.023                             | 0.939                 | 0.731                         |
| 2605.3     | Neu5Ac <sub>1</sub> Fuc <sub>1</sub> Hex <sub>5</sub> HexNAc <sub>4</sub> | 0.002                       | 0.000                             | 0.014                 | 0.971                         |
| 2646.3     | Neu5Ac <sub>1</sub> Fuc <sub>1</sub> Hex <sub>4</sub> HexNAc <sub>5</sub> | 0.008                       | 0.000                             | 0.189                 | 0.966                         |
| 2792.4     | Neu5Ac <sub>2</sub> Hex <sub>5</sub> HexNAc <sub>4</sub>                  | 0.105                       | 0.076                             | 0.576                 | 0.724                         |
| 2820.4     | Neu5Ac <sub>1</sub> Fuc <sub>2</sub> Hex <sub>4</sub> HexNAc <sub>5</sub> | 0.273                       | 0.048                             | 0.835                 | 0.950                         |
| 2837.4     | Fuc <sub>3</sub> Hex <sub>5</sub> HexNAc <sub>5</sub>                     | 0.026                       | 0.001                             | 0.188                 | 0.448                         |
| 2850.4     | Neu5Ac <sub>1</sub> Fuc <sub>1</sub> Hex <sub>5</sub> HexNAc <sub>5</sub> | 0.003                       | 0.000                             | 0.977                 | 0.657                         |
| 2966.5     | Neu5Ac <sub>2</sub> Fuc <sub>1</sub> Hex <sub>5</sub> HexNAc <sub>4</sub> | 0.000                       | 0.000                             | 0.060                 | 0.866                         |

Table S3: Two-way analysis of variance (ANOVA) to evaluate the statistical significance of gender in the dataset of O-glycans. P-values  $\leq 0.05$  were considered as statistically significant and p-values  $\leq 0.01$  as highly significant.

| <i>m/z</i> | Composition                                              | Significance<br>Levene-Test | Significance –<br>Patient Groups | Significance –<br>Sex | Significance –<br>Group * Sex |
|------------|----------------------------------------------------------|-----------------------------|----------------------------------|-----------------------|-------------------------------|
| 273.1      | Hex <sub>1</sub>                                         | 0.000                       | 0.000                            | 0.036                 | 0.006                         |
| 314.2      | HexNAc <sub>1</sub>                                      | 0.145                       | 0.002                            | 0.104                 | 0.197                         |
| 518.3      | Hex <sub>1</sub> HexNAc <sub>1</sub>                     | 0.002                       | 0.000                            | 0.416                 | 0.633                         |
| 559.3      | HexNAc <sub>2</sub>                                      | 0.309                       | 0.000                            | 0.856                 | 0.823                         |
| 675.3      | NeuAc <sub>1</sub> HexNAc <sub>1</sub>                   | 0.871                       | 0.001                            | 0.941                 | 0.563                         |
| 722.4      | Hex <sub>2</sub> HexNAc <sub>1</sub>                     | 0.962                       | 0.000                            | 0.747                 | 0.720                         |
| 763.4      | Hex <sub>1</sub> HexNAc <sub>2</sub>                     | 0.383                       | 0.000                            | 0.987                 | 0.777                         |
| 804.4      | HexNAc <sub>3</sub>                                      | 0.132                       | 0.000                            | 0.668                 | 0.436                         |
| 825.4      | Fuc <sub>2</sub> Hex <sub>2</sub>                        | 0.102                       | 0.000                            | 0.923                 | 0.270                         |
| 879.4      | NeuAc <sub>1</sub> Hex <sub>1</sub> HexNAc <sub>1</sub>  | 0.000                       | 0.000                            | 0.551                 | 0.423                         |
| 967.5      | Hex <sub>2</sub> HexNAc <sub>2</sub>                     | 0.057                       | 0.001                            | 0.907                 | 0.540                         |
| 1124.6     | Neu5Ac <sub>1</sub> Hex <sub>1</sub> HexNAc <sub>2</sub> | 0.066                       | 0.003                            | 0.029                 | 0.918                         |
| 1240.6     | NeuAc <sub>2</sub> Hex <sub>1</sub> HexNAc <sub>1</sub>  | 0.000                       | 0.000                            | 0.091                 | 0.575                         |

Table S4: N-Glycans detected in this study by MALDI-TOF-MS.

| $m/z$  | Composition                                                               |  |  |
|--------|---------------------------------------------------------------------------|--|--|
| 1171.6 | Hex <sub>3</sub> HexNAc <sub>2</sub>                                      |  |  |
| 1345.7 | Fuc <sub>1</sub> Hex <sub>3</sub> HexNAc <sub>2</sub>                     |  |  |
| 1375.7 | Hex <sub>4</sub> HexNAc <sub>2</sub>                                      |  |  |
| 1579.8 | Hex <sub>5</sub> HexNAc <sub>2</sub>                                      |  |  |
| 1590.8 | Fuc <sub>1</sub> Hex <sub>3</sub> HexNAc <sub>3</sub>                     |  |  |
| 1620.8 | Hex <sub>4</sub> HexNAc <sub>3</sub>                                      |  |  |
| 1661.8 | Hex <sub>3</sub> HexNAc <sub>4</sub>                                      |  |  |
| 1753.9 | Fuc <sub>1</sub> Hex <sub>5</sub> HexNAc <sub>2</sub>                     |  |  |
| 1783.9 | Hex <sub>6</sub> HexNAc <sub>2</sub>                                      |  |  |
| 1794.9 | Fuc <sub>1</sub> Hex <sub>4</sub> HexNAc <sub>3</sub>                     |  |  |
| 1835.9 | Fuc <sub>1</sub> Hex <sub>3</sub> HexNAc <sub>4</sub>                     |  |  |
| 1865.9 | Hex <sub>4</sub> HexNAc <sub>4</sub>                                      |  |  |
| 1907.0 | Hex <sub>3</sub> HexNAc <sub>5</sub>                                      |  |  |
| 1982.0 | Neu5Ac <sub>1</sub> Hex <sub>4</sub> HexNAc <sub>3</sub>                  |  |  |
| 1988.0 | Hex <sub>7</sub> HexNAc <sub>2</sub>                                      |  |  |
| 1999.0 | Fuc <sub>1</sub> Hex <sub>5</sub> HexNAc <sub>3</sub>                     |  |  |
| 2010.0 | Fuc <sub>2</sub> Hex <sub>3</sub> HexNAc <sub>5</sub>                     |  |  |
| 2029.0 | Hex <sub>6</sub> HexNAc <sub>3</sub>                                      |  |  |
| 2040.0 | Fuc <sub>1</sub> Hex <sub>4</sub> HexNAc <sub>4</sub>                     |  |  |
| 2070.0 | Hex <sub>5</sub> HexNAc <sub>4</sub>                                      |  |  |
| 2081.1 | Fuc <sub>1</sub> Hex <sub>3</sub> HexNAc <sub>5</sub>                     |  |  |
| 2111.1 | Hex <sub>4</sub> HexNAc <sub>5</sub>                                      |  |  |
| 2152.1 | Hex <sub>3</sub> HexNAc <sub>6</sub>                                      |  |  |
| 2156.1 | Neu5Ac <sub>1</sub> Fuc <sub>1</sub> Hex <sub>4</sub> HexNAc <sub>3</sub> |  |  |
| 2192.1 | Hex <sub>8</sub> HexNAc <sub>2</sub>                                      |  |  |
| 2214.1 | Fuc <sub>2</sub> Hex <sub>4</sub> HexNAc <sub>4</sub>                     |  |  |
| 2227.1 | Neu5Ac <sub>1</sub> Hex <sub>4</sub> HexNAc <sub>4</sub>                  |  |  |
| 2244.1 | Fuc <sub>1</sub> Hex <sub>5</sub> HexNAc <sub>4</sub>                     |  |  |
| 2285.2 | Fuc <sub>1</sub> Hex <sub>4</sub> HexNAc <sub>5</sub>                     |  |  |
| 2315.2 | Hex <sub>5</sub> HexNAc <sub>5</sub>                                      |  |  |
| 2326.2 | Fuc <sub>1</sub> Hex <sub>3</sub> HexNAc <sub>6</sub>                     |  |  |
| 2360.2 | Neu5Ac <sub>1</sub> Fuc <sub>1</sub> Hex <sub>5</sub> HexNAc <sub>3</sub> |  |  |
| 2390.2 | Neu5Ac <sub>1</sub> Hex <sub>6</sub> HexNAc <sub>3</sub>                  |  |  |
| 2396.2 | Hex <sub>9</sub> HexNAc <sub>2</sub>                                      |  |  |
| 2401.2 | Neu5Ac <sub>1</sub> Fuc <sub>1</sub> Hex <sub>4</sub> HexNAc <sub>4</sub> |  |  |
| 2418.2 | Fuc <sub>2</sub> Hex <sub>5</sub> HexNAc <sub>4</sub>                     |  |  |
| 2431.2 | Neu5Ac <sub>1</sub> Hex <sub>5</sub> HexNAc <sub>4</sub>                  |  |  |
| 2459.2 | Fuc <sub>2</sub> Hex <sub>4</sub> HexNAc <sub>5</sub>                     |  |  |

|        |                                                                           |  |
|--------|---------------------------------------------------------------------------|--|
| 2472.2 | Neu5Ac <sub>1</sub> Hex <sub>4</sub> HexNAc <sub>5</sub>                  |  |
| 2489.3 | Fuc <sub>1</sub> Hex <sub>5</sub> HexNAc <sub>5</sub>                     |  |
| 2519.3 | Hex <sub>6</sub> HexNAc <sub>5</sub>                                      |  |
| 2530.3 | Fuc <sub>1</sub> Hex <sub>4</sub> HexNAc <sub>6</sub>                     |  |
| 2560.3 | Hex <sub>5</sub> HexNAc <sub>6</sub>                                      |  |
| 2564.3 | Neu5Ac <sub>1</sub> Fuc <sub>1</sub> Hex <sub>6</sub> HexNAc <sub>3</sub> |  |
| 2592.3 | Fuc <sub>3</sub> Hex <sub>5</sub> HexNAc <sub>4</sub>                     |  |
| 2605.3 | Neu5Ac <sub>1</sub> Fuc <sub>1</sub> Hex <sub>5</sub> HexNAc <sub>4</sub> |  |
| 2646.3 | Neu5Ac <sub>1</sub> Fuc <sub>1</sub> Hex <sub>4</sub> HexNAc <sub>5</sub> |  |
| 2663.3 | Fuc <sub>2</sub> Hex <sub>5</sub> HexNAc <sub>5</sub>                     |  |
| 2676.3 | Neu5Ac <sub>1</sub> Hex <sub>5</sub> HexNAc <sub>5</sub>                  |  |
| 2693.4 | Fuc <sub>1</sub> Hex <sub>6</sub> HexNAc <sub>5</sub>                     |  |
| 2704.4 | Fuc <sub>2</sub> Hex <sub>4</sub> HexNAc <sub>6</sub>                     |  |
| 2717.4 | Neu5Ac <sub>1</sub> Hex <sub>4</sub> HexNAc <sub>6</sub>                  |  |
| 2734.4 | Fuc <sub>1</sub> Hex <sub>5</sub> HexNAc <sub>6</sub>                     |  |
| 2749.5 | Neu5Ac <sub>1</sub> Fuc <sub>3</sub> Hex <sub>4</sub> HexNAc <sub>4</sub> |  |
| 2764.4 | Hex <sub>6</sub> HexNAc <sub>6</sub>                                      |  |
| 2792.4 | Neu5Ac <sub>2</sub> Hex <sub>5</sub> HexNAc <sub>4</sub>                  |  |
| 2820.4 | Neu5Ac <sub>1</sub> Fuc <sub>2</sub> Hex <sub>4</sub> HexNAc <sub>5</sub> |  |
| 2837.4 | Fuc <sub>3</sub> Hex <sub>5</sub> HexNAc <sub>5</sub>                     |  |
| 2850.4 | Neu5Ac <sub>1</sub> Fuc <sub>1</sub> Hex <sub>5</sub> HexNAc <sub>5</sub> |  |
| 2880.4 | Neu5Ac <sub>1</sub> Hex <sub>6</sub> HexNAc <sub>5</sub>                  |  |
| 2891.5 | Neu5Ac <sub>1</sub> Fuc <sub>1</sub> Hex <sub>4</sub> HexNAc <sub>6</sub> |  |
| 2908.5 | Fuc <sub>2</sub> Hex <sub>5</sub> HexNAc <sub>6</sub>                     |  |
| 2921.5 | Neu5Ac <sub>1</sub> Hex <sub>5</sub> HexNAc <sub>6</sub>                  |  |
| 2966.5 | Neu5Ac <sub>2</sub> Fuc <sub>1</sub> Hex <sub>5</sub> HexNAc <sub>4</sub> |  |

Table S5: ROC curves were generated for free glycans using 89 patients with AD. 86 disease control patients and 87 healthy control patients.

| <i>m/z</i> | Composition                                             | AD – Disease Control | AD – Healthy Control | Disease Control – Healthy Control |
|------------|---------------------------------------------------------|----------------------|----------------------|-----------------------------------|
| 273.1      | Hex <sub>1</sub>                                        | 0.85                 | 0.76                 | 0.45                              |
| 314.2      | HexNAc <sub>1</sub>                                     | 0.55                 | 0.39                 | 0.37                              |
| 430.2      | Neu5Ac <sub>1</sub>                                     | 0.51                 | 0.55                 | 0.53                              |
| 518.3      | Hex <sub>1</sub> HexNAc <sub>1</sub>                    | 0.24                 | 0.15                 | 0.44                              |
| 559.3      | HexNAc <sub>2</sub>                                     | 0.41                 | 0.25                 | 0.34                              |
| 675.3      | NeuAc <sub>1</sub> HexNAc <sub>1</sub>                  | 0.29                 | 0.13                 | 0.30                              |
| 722.4      | Hex <sub>2</sub> HexNAc <sub>1</sub>                    | 0.38                 | 0.17                 | 0.33                              |
| 733.4      | Fuc <sub>1</sub> HexNAc <sub>2</sub>                    | 0.27                 | 0.26                 | 0.50                              |
| 791.4      | Neu5Ac <sub>2</sub>                                     | 0.46                 | 0.53                 | 0.57                              |
| 825.4      | Fuc <sub>2</sub> Hex <sub>2</sub>                       | 0.39                 | 0.39                 | 0.49                              |
| 879.4      | NeuAc <sub>1</sub> Hex <sub>1</sub> HexNAc <sub>1</sub> | 0.21                 | 0.30                 | 0.59                              |
| 926.5      | Hex <sub>3</sub> HexNAc <sub>1</sub>                    | 0.32                 | 0.25                 | 0.46                              |
| 967.5      | Hex <sub>2</sub> HexNAc <sub>2</sub>                    | 0.34                 | 0.28                 | 0.50                              |
| 1130.6     | Hex <sub>4</sub> HexNAc <sub>1</sub>                    | 0.33                 | 0.33                 | 0.53                              |
| 1171.6     | Hex <sub>3</sub> HexNAc <sub>2</sub>                    | 0.39                 | 0.44                 | 0.57                              |
| 1212.6     | Hex <sub>2</sub> HexNAc <sub>3</sub>                    | 0.50                 | 0.44                 | 0.44                              |
| 1240.6     | NeuAc <sub>2</sub> Hex <sub>1</sub> HexNAc <sub>1</sub> | 0.39                 | 0.48                 | 0.58                              |
| 1334.7     | Hex <sub>5</sub> HexNAc <sub>1</sub>                    | 0.35                 | 0.42                 | 0.58                              |
| 1601.8     | NeuAc <sub>3</sub> Hex <sub>1</sub> HexNAc <sub>1</sub> | 0.46                 | 0.71                 | 0.72                              |

Table S6: Correlations were calculated between the free glycans Hex<sub>1</sub> (*m/z* 273.1), HexNAc<sub>1</sub>Hex<sub>1</sub>Neu5Ac<sub>1</sub> (*m/z* 879.4) and CSF parameters using the Spearman's rank correlation coefficient,  $p < 0.05$  was considered as statistically significant.

| Hex <sub>1</sub>                                         |       |                 |                  |                  |          |       |       |
|----------------------------------------------------------|-------|-----------------|------------------|------------------|----------|-------|-------|
|                                                          | MMSE  | Age of patients | Aβ <sub>40</sub> | Aβ <sub>42</sub> | Aβ-Ratio | pTau  | tTau  |
| AD                                                       | 0,232 | 0,550           | 0,001            | 0,147            | 0,238    | 0,031 | 0,024 |
| HC                                                       | 0,792 | 0,943           | 0,002            | 0,031            | 0,598    | 0,000 | 0,015 |
| DC                                                       | 0,001 | 0,645           | 0,000            | 0,000            | 0,239    | 0,264 | 0,888 |
| HexNAc <sub>1</sub> Hex <sub>1</sub> Neu5Ac <sub>1</sub> |       |                 |                  |                  |          |       |       |
| AD                                                       | 0,178 | 0,430           | 0,822            | 0,742            | 0,959    | 0,577 | 0,749 |
| HC                                                       | 0,508 | 0,321           | 0,000            | 0,068            | 0,585    | 0,004 | 0,060 |
| DC                                                       | 0,051 | 0,400           | 0,009            | 0,029            | 0,559    | 0,961 | 0,227 |



Table S7: Mean relative areas and standard deviations of N-glycans isolated from the three patient cohorts as judged by MALDI-TOF-MS. AD: Alzheimer's disease, DC: disease control and HC: healthy control.

| <i>m/z</i> | Composition                                                               | AD patients [%] |         | Disease control patients [%] |         | Healthy control patients [%] |         |
|------------|---------------------------------------------------------------------------|-----------------|---------|------------------------------|---------|------------------------------|---------|
|            |                                                                           | Males           | Females | Males                        | Females | Males                        | Females |
| 1579.8     | Hex <sub>5</sub> HexNAc <sub>2</sub>                                      | 6.13 ±          | 6.74 ±  | 5.84 ±                       | 7.36 ±  | 7.23 ±                       | 7.80 ±  |
|            |                                                                           | 1.74            | 1.69    | 1.94                         | 2.66    | 2.23                         | 2.79    |
| 1661.8     | Hex <sub>3</sub> HexNAc <sub>4</sub>                                      | 1.12 ±          | 1.00 ±  | 1.21 ±                       | 1.40 ±  | 1.10 ±                       | 1.17 ±  |
|            |                                                                           | 0.36            | 0.36    | 0.43                         | 0.54    | 0.34                         | 0.32    |
| 1783.9     | Hex <sub>6</sub> HexNAc <sub>2</sub>                                      | 0.99 ±          | 1.05 ±  | 1.12 ±                       | 1.10 ±  | 1.11 ±                       | 1.13 ±  |
|            |                                                                           | 0.19            | 0.19    | 0.36                         | 0.29    | 0.23                         | 0.24    |
| 1835.9     | Fuc <sub>1</sub> Hex <sub>3</sub> HexNAc <sub>4</sub>                     | 4.65 ±          | 4.10 ±  | 4.74 ±                       | 5.46 ±  | 4.82 ±                       | 4.13 ±  |
|            |                                                                           | 1.13            | 1.16    | 2.21                         | 2.29    | 1.69                         | 1.11    |
| 2040.0     | Fuc <sub>1</sub> Hex <sub>4</sub> HexNAc <sub>4</sub>                     | 3.98 ±          | 3.38 ±  | 3.89 ±                       | 4.02 ±  | 4.22 ±                       | 3.75 ±  |
|            |                                                                           | 0.79            | 0.93    | 1.65                         | 1.19    | 1.30                         | 1.07    |
| 2070.0     | Hex <sub>5</sub> HexNAc <sub>4</sub>                                      | 0.99 ±          | 0.98 ±  | 0.97 ±                       | 0.99 ±  | 1.01 ±                       | 1.02 ±  |
|            |                                                                           | 0.21            | 0.19    | 0.29                         | 0.29    | 0.23                         | 0.17    |
| 2081.1     | Fuc <sub>1</sub> Hex <sub>3</sub> HexNAc <sub>5</sub>                     | 17.38 ±         | 17.68 ± | 15.20 ±                      | 17.96 ± | 18.41 ±                      | 18.91 ± |
|            |                                                                           | 3.73            | 2.52    | 5.71                         | 3.55    | 3.74                         | 4.20    |
| 2111.1     | Hex <sub>4</sub> HexNAc <sub>5</sub>                                      | 1.09 ±          | 1.05 ±  | 1.22 ±                       | 1.30 ±  | 1.14 ±                       | 1.13 ±  |
|            |                                                                           | 0.33            | 0.36    | 0.43                         | 0.35    | 0.38                         | 0.26    |
| 2214.1     | Fuc <sub>2</sub> Hex <sub>4</sub> HexNAc <sub>4</sub>                     | 1.40 ±          | 1.37 ±  | 1.14 ±                       | 1.35 ±  | 1.30 ±                       | 1.26 ±  |
|            |                                                                           | 0.30            | 0.31    | 0.32                         | 0.32    | 0.26                         | 0.24    |
| 2244.1     | Fuc <sub>1</sub> Hex <sub>5</sub> HexNAc <sub>4</sub>                     | 1.73 ±          | 1.54 ±  | 1.64 ±                       | 1.54 ±  | 1.87 ±                       | 1.72 ±  |
|            |                                                                           | 0.31            | 0.29    | 0.56                         | 0.33    | 0.45                         | 0.37    |
| 2285.2     | Fuc <sub>1</sub> Hex <sub>4</sub> HexNAc <sub>5</sub>                     | 6.64 ±          | 6.54 ±  | 5.93 ±                       | 6.41 ±  | 6.31 ±                       | 6.24 ±  |
|            |                                                                           | 1.28            | 0.96    | 2.17                         | 1.44    | 1.17                         | 1.04    |
| 2431.2     | Neu5Ac <sub>1</sub> Hex <sub>5</sub> HexNAc <sub>4</sub>                  | 2.97 ±          | 3.24 ±  | 2.90 ±                       | 2.73 ±  | 3.00 ±                       | 2.74 ±  |
|            |                                                                           | 0.85            | 1.24    | 1.64                         | 0.94    | 1.12                         | 1.13    |
| 2459.2     | Fuc <sub>2</sub> Hex <sub>4</sub> HexNAc <sub>5</sub>                     | 6.34 ±          | 7.11 ±  | 5.34 ±                       | 6.19 ±  | 7.11 ±                       | 8.00 ±  |
|            |                                                                           | 1.37            | 1.46    | 2.22                         | 1.65    | 1.44                         | 1.91    |
| 2489.3     | Fuc <sub>1</sub> Hex <sub>5</sub> HexNAc <sub>5</sub>                     | 1.94 ±          | 2.11 ±  | 1.78 ±                       | 1.85 ±  | 1.87 ±                       | 1.97 ±  |
|            |                                                                           | 0.40            | 0.38    | 0.60                         | 0.39    | 0.34                         | 0.42    |
| 2592.3     | Fuc <sub>3</sub> Hex <sub>5</sub> HexNAc <sub>4</sub>                     | 1.09 ±          | 1.10 ±  | 0.95 ±                       | 0.98 ±  | 1.07 ±                       | 1.03 ±  |
|            |                                                                           | 0.29            | 0.27    | 0.35                         | 0.36    | 0.26                         | 0.24    |
| 2605.3     | Neu5Ac <sub>1</sub> Fuc <sub>1</sub> Hex <sub>5</sub> HexNAc <sub>4</sub> | 3.23 ±          | 3.04 ±  | 2.73 ±                       | 2.55 ±  | 2.91 ±                       | 2.68 ±  |
|            |                                                                           | 0.60            | 0.44    | 0.91                         | 0.63    | 0.57                         | 0.55    |
| 2646.3     | Neu5Ac <sub>1</sub> Fuc <sub>1</sub> Hex <sub>4</sub> HexNAc <sub>5</sub> | 2.17 ±          | 2.08 ±  | 1.82 ±                       | 1.75 ±  | 1.75 ±                       | 1.63 ±  |
|            |                                                                           | 0.51            | 0.49    | 0.70                         | 0.60    | 0.48                         | 0.42    |
| 2792.4     | Neu5Ac <sub>2</sub> Hex <sub>5</sub> HexNAc <sub>4</sub>                  | 8.58 ±          | 8.87 ±  | 8.16 ±                       | 7.62 ±  | 7.66 ±                       | 7.07 ±  |
|            |                                                                           | 3.30            | 3.47    | 4.82                         | 4.13    | 3.60                         | 4.21    |
| 2820.4     | Neu5Ac <sub>1</sub> Fuc <sub>2</sub> Hex <sub>4</sub> HexNAc <sub>5</sub> | 1.03 ±          | 1.02 ±  | 0.91 ±                       | 0.89 ±  | 0.92 ±                       | 0.93 ±  |
|            |                                                                           | 0.37            | 0.28    | 0.37                         | 0.38    | 0.32                         | 0.35    |
| 2837.4     | Fuc <sub>3</sub> Hex <sub>5</sub> HexNAc <sub>5</sub>                     | 1.10 ±          | 1.23 ±  | 1.03 ±                       | 1.01 ±  | 1.19 ±                       | 1.28 ±  |
|            |                                                                           | 0.35            | 0.34    | 0.46                         | 0.42    | 0.40                         | 0.34    |
| 2850.4     | Neu5Ac <sub>1</sub> Fuc <sub>1</sub> Hex <sub>5</sub> HexNAc <sub>5</sub> | 2.12 ±          | 2.23 ±  | 1.90 ±                       | 1.85 ±  | 1.80 ±                       | 1.75 ±  |
|            |                                                                           | 0.57            | 0.59    | 0.88                         | 0.71    | 0.55                         | 0.60    |
| 2966.5     | Neu5Ac <sub>2</sub> Fuc <sub>1</sub> Hex <sub>5</sub> HexNAc <sub>4</sub> | 2.64 ±          | 2.35 ±  | 2.25 ±                       | 2.07 ±  | 2.03 ±                       | 1.87 ±  |
|            |                                                                           | 0.85            | 0.53    | 1.11                         | 1.09    | 0.71                         | 0.92    |
| other      |                                                                           | 20.24           | 19.70   | 25.56                        | 21.05   | 19.70                        | 20.23   |

Table S8: Mean relative areas and standard deviations of O-glycans isolated from the three patient cohorts as judged by MALDI-TOF-MS. AD: Alzheimer's disease, DC: disease control and HC: healthy control. As m/z 273.1 and 1124.6 were gender-dependent (Supplementary Material Table S3), mean relative areas and standard deviations were calculated separately.

| m/z           | Composition                                              | AD patients [%] |             | Disease control patients [%] |            | Healthy control patients [%] |            |
|---------------|----------------------------------------------------------|-----------------|-------------|------------------------------|------------|------------------------------|------------|
|               |                                                          | Males           | Females     | Males                        | Females    | Males                        | Females    |
| <b>273.1</b>  | Hex <sub>1</sub>                                         | 22.9 ± 11.1     | 16.3 ± 10.5 | 15.3 ± 5.8                   | 15.0 ± 8.2 | 12.7 ± 4.9                   | 13.2 ± 4.4 |
| <b>1124.6</b> | Neu5Ac <sub>1</sub> Hex <sub>1</sub> HexNAc <sub>2</sub> | 0.8 ± 0.6       | 0.7 ± 0.4   | 0.8 ± 0.5                    | 0.6 ± 0.3  | 1.0 ± 0.7                    | 0.9 ± 0.4  |
| <b>314.2</b>  | HexNAc <sub>1</sub>                                      | 44.2 ± 11.2     |             | 50.0 ± 10.6                  |            | 45.0 ± 12.1                  |            |
| <b>518.3</b>  | Hex <sub>1</sub> HexNAc <sub>1</sub>                     | 8.2 ± 2.0       |             | 10.1 ± 4.3                   |            | 8.5 ± 2.5                    |            |
| <b>559.3</b>  | HexNAc <sub>2</sub>                                      | 5.4 ± 1.4       |             | 4.3 ± 1.3                    |            | 4.9 ± 1.1                    |            |
| <b>675.3</b>  | Neu5Ac <sub>1</sub> HexNAc <sub>1</sub>                  | 3.0 ± 1.3       |             | 2.8 ± 1.6                    |            | 3.6 ± 1.3                    |            |
| <b>722.4</b>  | Hex <sub>2</sub> HexNAc <sub>1</sub>                     | 3.6 ± 1.1       |             | 3.1 ± 1.1                    |            | 4.2 ± 1.2                    |            |
| <b>763.8</b>  | Hex <sub>1</sub> HexNAc <sub>2</sub>                     | 3.0 ± 1.1       |             | 2.6 ± 1.1                    |            | 3.5 ± 1.2                    |            |
| <b>804.4</b>  | HexNAc <sub>3</sub>                                      | 2.3 ± 1.5       |             | 2.4 ± 1.5                    |            | 3.3 ± 1.8                    |            |
| <b>825.4</b>  | Fuc <sub>2</sub> Hex <sub>2</sub>                        | 2.3 ± 1.0       |             | 2.1 ± 1.0                    |            | 2.9 ± 1.2                    |            |
| <b>879.4</b>  | Neu5Ac <sub>1</sub> Hex <sub>1</sub> HexNAc <sub>1</sub> | 3.0 ± 1.2       |             | 2.7 ± 1.5                    |            | 4.3 ± 2.1                    |            |
| <b>967.5</b>  | Hex <sub>2</sub> HexNAc <sub>2</sub>                     | 2.0 ± 1.0       |             | 1.9 ± 1.1                    |            | 2.5 ± 1.3                    |            |
| <b>1240.6</b> | Neu5Ac <sub>2</sub> Hex <sub>1</sub> HexNAc <sub>1</sub> | 0.6 ± 0.5       |             | 0.6 ± 0.6                    |            | 1.2 ± 1.0                    |            |

Table S9: Glycan types and Glycosylation features used to generate the mean relative intensities presented in Figure 3. Bold: sialylated glycans.

| Glycan type | Subcategory               | Relative intensities of MS signals at m/z                                                                                  |
|-------------|---------------------------|----------------------------------------------------------------------------------------------------------------------------|
| Free        | N: N-glycans              | 733.4, 926.5, 1130.6, 1171.6, 1334.7                                                                                       |
|             | O: O-glycans              | 825.4, 967.5, 1212.6, <b>1240.6</b> , <b>1601.8</b>                                                                        |
|             | Fragments (N-, O-glycans) | 273.1, 314.2, 518.3, 559.3, <b>675.3</b> , 722.4, <b>879.4</b>                                                             |
|             | Free Sialic Acids         | <b>430.2</b> , <b>791.4</b>                                                                                                |
| N-glycans   | high-mannose              | 1579.8, 1783.9                                                                                                             |
|             | biantennary               | 1661.8, 1835.9, 2040.0, 2070.0, 2214.1, 2244.1, <b>2431.2</b> , 2592.3, <b>2605.3</b> , <b>2792.4</b> , <b>2966.5</b>      |
|             | bisected biantennary      | 2081.1, 2111.1, 2285.2, 2459.2, 2489.3, <b>2646.3</b> , <b>2820.4</b> , 2837.4, 2850.4                                     |
| O-glycans   |                           | 273.1, 314.2, 518.3, 559.3, <b>675.3</b> , 722.4, 763.4, 804.4, 825.4, <b>879.4</b> , 967.5, <b>1124.6</b> , <b>1240.6</b> |

Table S10. Correlations were calculated between N-glycans groups by features and t-Tau using the Spearman's rank correlation coefficient, p<0.05 and p<0.01 were considered as statistically significant and very significant.

| Group                   | Spearman |         |
|-------------------------|----------|---------|
|                         | Males    | Females |
| high-mannose            | 0.018    | 0.616   |
| asialylated biantennary | 0.183    | 0.106   |
| sialylated biantennary  | 0.889    | 0.163   |
| asialylated bisected    | 0.041    | 0.018   |
| sialylated bisected     | 0.000    | 0.000   |
